# Supplementary material for: Facile synthesis of nanosized graphene/Nafion hybrid materials and their application in electrochemical sensing of nitric oxide
Source: Royal Society of Chemistry journal article supplement (doi:10.1039/c5ay00604j), 2015-01-01
Supplement: c5ay00604j1.pdf [file c5ay00604j1.pdf]

### Supporting Information (SI)

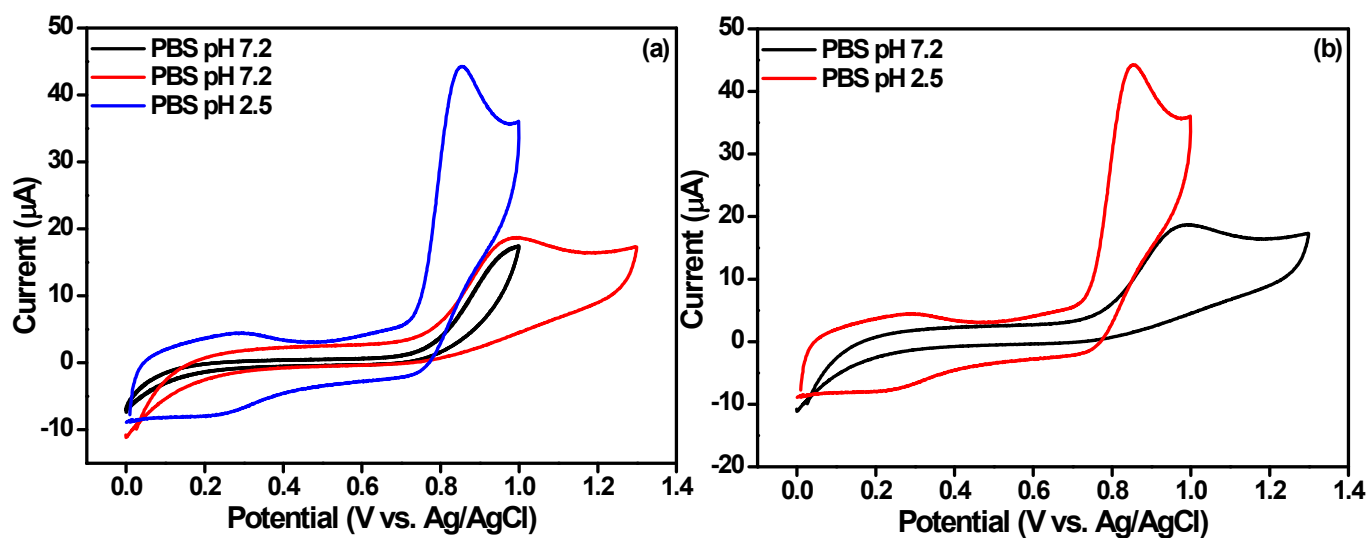

**Fig. 1.** CV plots of GC/G-Nf (16 h) modified electrode in different pH of 0.1 M PBS with the presence of 1 mM NaNO<sub>2</sub> at scan rate of 50 mV/s.
